# Supplementary material
Source: Royal Society of Chemistry journal article supplement (doi:10.1039/d6tb00023a)
Supplement: d6tb00023a1.pdf [file d6tb00023a1.pdf]

## Supporting Information

### **An Antibacterial Gradient-Pore Artificial Skin with High Exudate-Absorption and Hemostatic Properties**

Dongxiao Ren<sup>1,†</sup>, Wenxi Zhu<sup>1,†</sup>, Sai Yan<sup>1</sup>, Shuang Wu<sup>1</sup>, Xunda Feng<sup>1,3</sup>, Ran Cao<sup>1,2,\*</sup>,  
Meifang Zhu<sup>1</sup>

*1 State Key Laboratory of Advanced Fiber Materials, College of Materials Science and Engineering, Donghua University, Shanghai, 201620, China.*

*2 Pingdingshan Industrial Research Institute, Henan, 467036, China;*

*3 Center for Advanced Low-Dimension Materials, and College of Materials Sciences and Engineering, Donghua University, Shanghai, 201620, China.*

<sup>†</sup>These authors contributed equally to this work

## Table of contents

|                                                                                                                                                                                                                           |    |
|---------------------------------------------------------------------------------------------------------------------------------------------------------------------------------------------------------------------------|----|
| 1.Fig. S1 Statistical analysis of pore size distribution in different layers of artificial skin with different concentration combinations.....                                                                            | S3 |
| 2.Fig. S2 (a) SEM images of the artificial skin after being immersed in PBS for two hours.(b) SEM images of the artificial skin after immersion in deionized water for two hours.....                                     | S3 |
| 3.Fig. S3 Cyclic compression curves of gradient-pore artificial skins with different concentration combinations .....                                                                                                     | S4 |
| 4.Fig. S4 Histological analysis images of implanted tissue using H&E staining and Masson staining (a) Subcutaneous embedding tissue section H&E staining. (b) Subcutaneous embedding tissue section Masson staining ..... | S4 |
| 5.Fig. S5 Wound closure percentages on days 3, 7, and 14 in the rat model.....                                                                                                                                            | S5 |

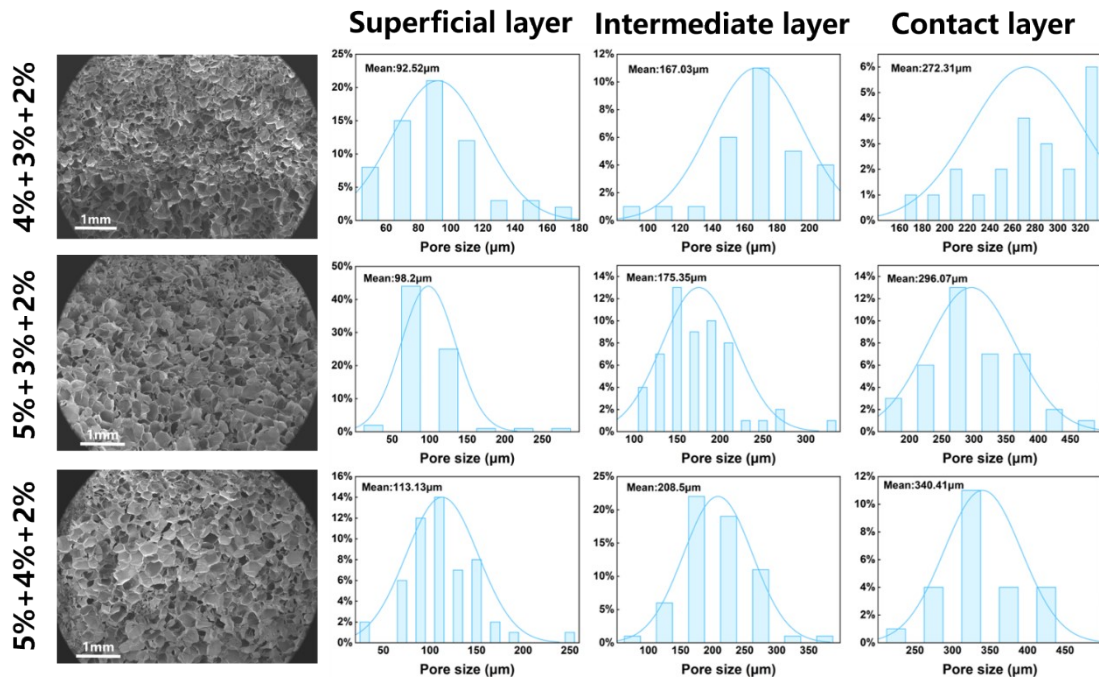

Fig. S1 Statistical analysis of pore size distribution in different layers of artificial skin with different concentration combinations

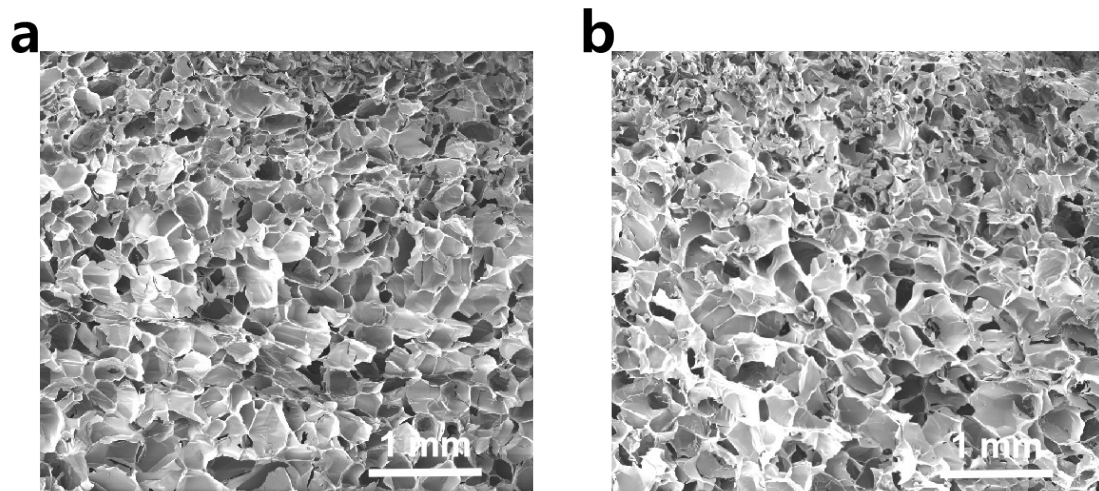

Fig. S2 (a) SEM images of the artificial skin after being immersed in PBS for two hours. (b) SEM images of the artificial skin after immersion in deionized water for two hours.

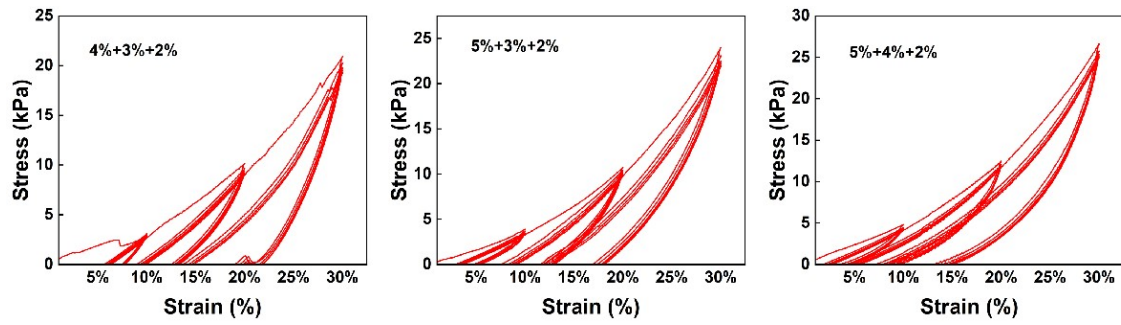

Fig. S3 Cyclic compression curves of gradient-pore artificial skins with different concentration combinations

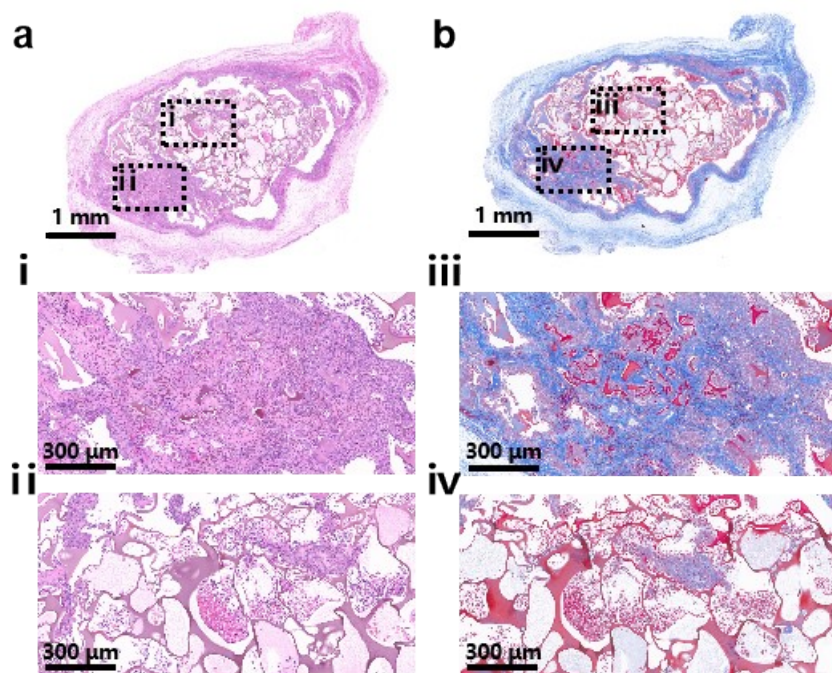

Fig. S4 Histological analysis images of implanted tissue using H&E staining and Masson staining (a) Subcutaneous embedding tissue section H&E staining. (b) Subcutaneous embedding tissue section Masson staining

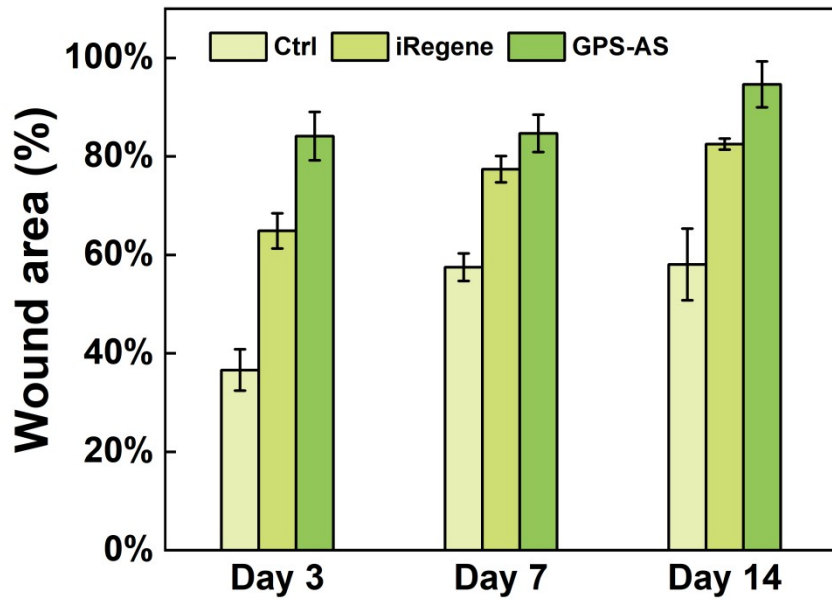

Fig. S5 Wound closure percentages on days 3, 7, and 14 in the rat model
